# Supplementary material for: Nano-encapsulation of halofuginone hydrobromide enhances anticoccidial activity against Eimeria tenella in chickens
Source: Royal Society of Chemistry journal article supplement (doi:10.1039/d2bm01543a), 2023-01-01
Supplement: d2bm01543a1.pdf [file d2bm01543a1.pdf]

Supplementary Material

## **Nano-encapsulation of Halofuginone Hydrobromide Enhances the Anticoccidial Activity Against *Eimeria tenella* in Chickens**

Mengjuan Lin<sup>a,b,#</sup>, Xinhao Song<sup>a,b,#</sup>, Runan Zuo<sup>a,b</sup>, Yuling Zheng<sup>a,b</sup>, Shiheng Hu<sup>a,b</sup>,  
Shasha Gao<sup>a,b</sup>, Lu Chen<sup>a,b</sup>, Yuan Zhu<sup>a,b</sup>, Xiaolin Xu<sup>a,b</sup>, Moxin Liu<sup>a,b</sup>, Junren Zhang<sup>a,b</sup>,  
Shanxiang Jiang<sup>a,b</sup>, Dawei Guo<sup>a,b,\*</sup>

<sup>a</sup> Engineering Center of Innovative Veterinary Drugs, Center for Veterinary Drug Research and Evaluation, Nanjing Agricultural University, 1 Weigang, Nanjing 210095, China

<sup>b</sup> MOE Joint International Research Laboratory of Animal Health and Food Safety, College of Veterinary Medicine, Nanjing Agricultural University, 1 Weigang, Nanjing 210095, China

<sup>#</sup> These authors equally contributed to this paper.

\* Dr. Dawei Guo is the corresponding author.

Correspondence:

Dawei Guo, Ph.D., Associate Professor

Engineering Center of Innovative Veterinary Drugs,

Nanjing Agricultural University,

1 Weigang, Nanjing 210095, PR China

Email: gdawei0123@njau.edu.cn

Tel: +86-25-84396215

Fax: +86-25-84398669

## Supplementary Data

**Table S1 Weight gain of chickens in each experimental group**

| Group | Mean initial weight (g) | Mean final weight (g) | Weight gain rate (%) | Relative weight gain rate (%) |
|-------|-------------------------|-----------------------|----------------------|-------------------------------|
| 1     | 82.46±9.78              | 122.99±17.27          | 49.16                | 100.00                        |
| 2     | 77.65±11.81             | 103.24±18.78          | 33.04                | 67.22                         |
| 3     | 81.02±9.87              | 123.35±15.20          | 52.24                | 106.27                        |
| 4     | 82.85±9.32              | 122.56±17.72          | 47.93                | 97.51                         |
| 5     | 82.7±9.47               | 127.16±15.25          | 53.77                | 109.38                        |
| 6     | 79.82±12.65             | 120.61±35.13          | 53.05                | 107.92                        |

**Note:** 1. Negative control group; 2. Infected and non-administered group; 3. Infected and treated with 3 mg/kg HF premix group; 4. Infected and treated with 3 mg/L HTPM group; 5. Infected and treated with 1.5 mg/L HTPM group; 6. Infected and treated with 0.75 mg/L HTPM group.

**Table S2 Conversion standard for value of cecal contents after *E.tenella* infection**

| Number of oocysts per gram of cecal contents ( $\times 10^6$ ) | Oocyst value |
|----------------------------------------------------------------|--------------|
| 0.0~0.1                                                        | 0            |
| 0.11~1.0                                                       | 5            |
| 1.10~1.9                                                       | 10           |
| 2.0~5.9                                                        | 20           |
| 6.0~10.9                                                       | 30           |
| $\geq 11.0$                                                    | 40           |

**Table S3 Characterization of as-prepared HTPM**

| Indicators | HD (nm)     | PDI         | ZP (mV)       | EE (%)      | DL (%)       | Solubility (mg/mL) |
|------------|-------------|-------------|---------------|-------------|--------------|--------------------|
| HTPM       | 12.65±0.089 | 0.274±0.008 | 8.03±0.242 mV | 71.1 ± 0.85 | 14.04 ± 0.46 | 34.4 ± 1.68        |

**Table S4 The  $K_E$  values of HTPM at 4 °C and 25 °C**

| Centrifugal time (min) | 4 °C        | 25 °C       |
|------------------------|-------------|-------------|
| 0                      | -           | -           |
| 5                      | 0.049±0.021 | 0.056±0.018 |
| 10                     | 0.034±0.028 | 0.050±0.011 |
| 20                     | 0.041±0.009 | 0.046±0.010 |
| 30                     | 0.074±0.014 | 0.083±0.044 |

**Table S5 Grade estimation of coccidiostats according to ACI values**

| ACI                    | >180             | 160-180              | 120-160     | <120    |
|------------------------|------------------|----------------------|-------------|---------|
| Grade of coccidiostats | Highly effective | Moderately effective | Inefficient | Invalid |

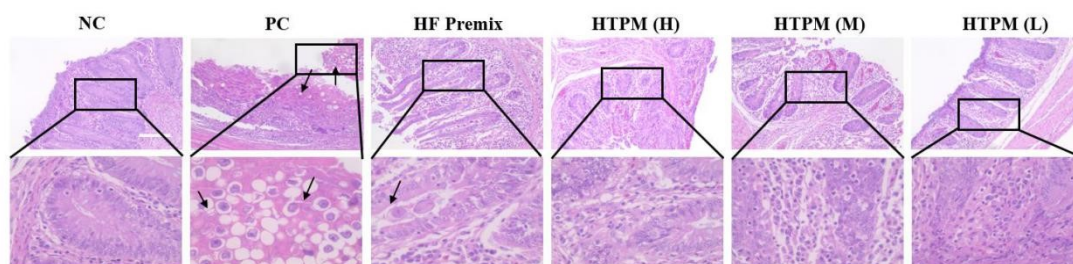

**Fig. S1** Histopathological observation of cecum in NC, PC, HF premix (3 mg/kg), HTPM (H) (3 mg/L), HTPM (M) (1.5 mg/L) and HTPM (L) (0.75 mg/L) groups, respectively. Scale bar = 50 μm.
